# Supplementary material
Source: Springer Nature journal article supplement (https://www.springermedizin.de/resource/supplementary/13049_2011_311_MOESM1_ESM.pdf/9666328)

**37.231 calls**

**Patients requiring vascular access:  
18.615 (estimated 50% of all missions)**

**Difficult vascular access:  
74 patients (0.40%)**

**Primary use of EZ-IO:  
10 patients (14%)**

**EZ-IO used after  
failed venous access:  
64 patients (86%)**

**77 attempts of IO needle insertions**

**Successful:  
n=75 (97%)**

**Failed:  
n=2 (3%)**

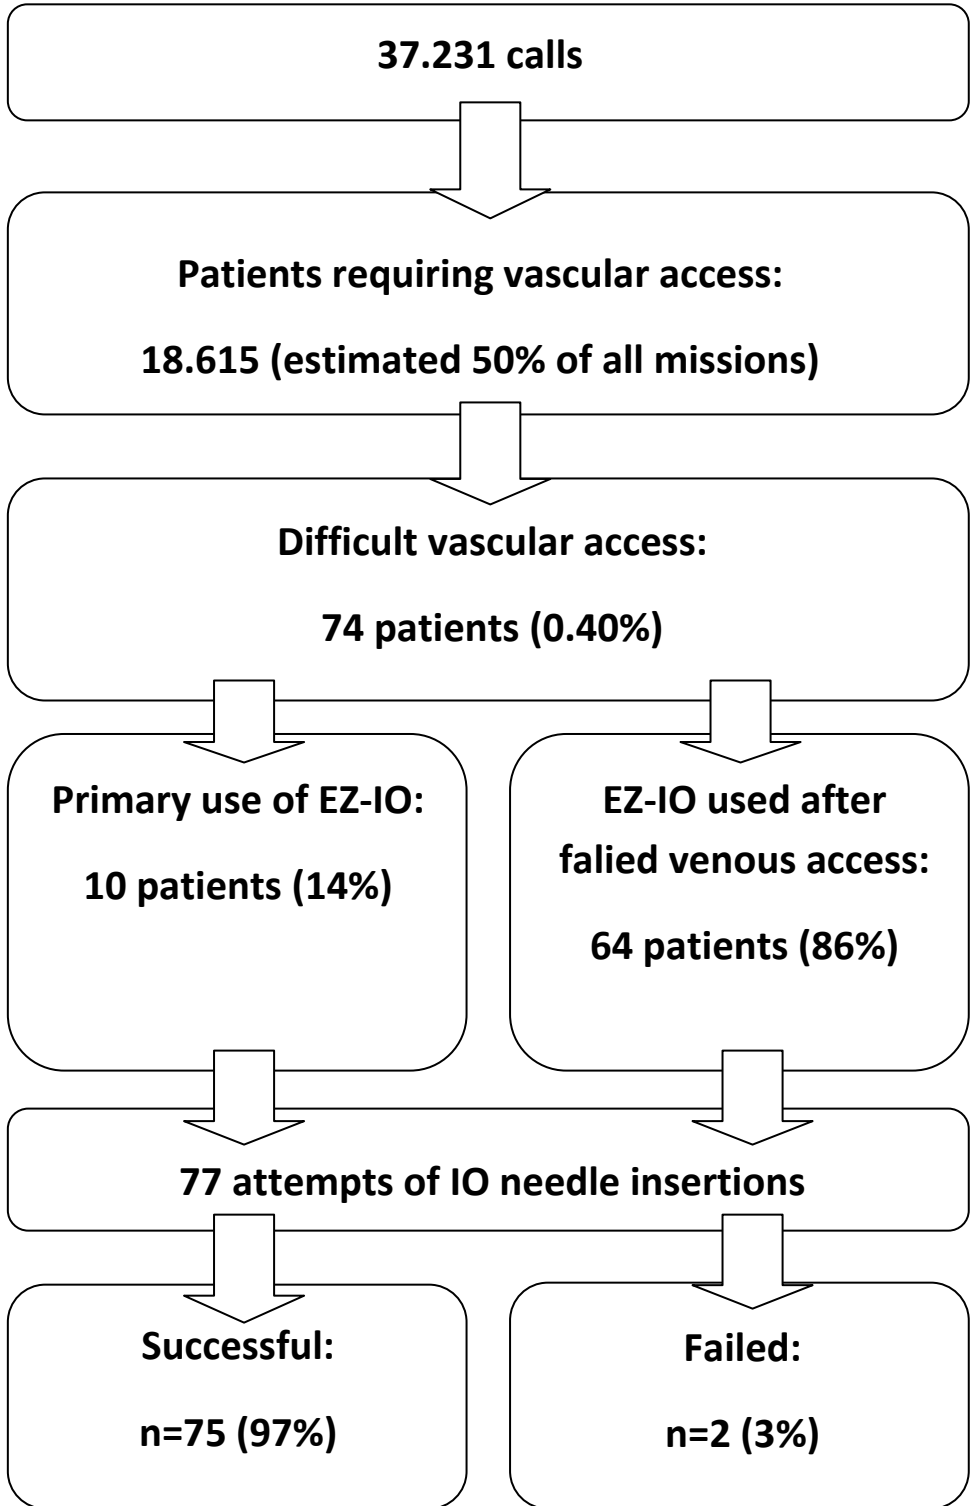

Supplement: MOESM1 [file 9666328]
